# Supplementary material for: RUFY3 links Arl8b and JIP4-Dynein complex to regulate lysosome size and positioning
Source: Research Square preprint supplement (doi:10.21203/rs.3.rs-345822/v1), 2021-04-15
Supplement: Supplementary file 1 [file a7b95b155d585072303386ee.xlsx]

## Sheet: Table I
Supplementary Table I: List of RUFY3 interacting proteins identified from HEK293T cell lysates using GST-pulldown assay followed by mass spectrometric analysis.
The interactome data was analyzed using CRAPOME tools (https://reprint-apms.org/).
(SPC, Spectral Peptide Count; FCA, Fold-Chage Score; SP, SAINT Probability Score)
Bait	Bait Gene	Prey	Prey Gene	Quant (SPC)	User Controls (SPC)	Avg. SPC	FCA	SP
RUFY3	RUFY3	RUFY3	RUFY3	320	0	320	339.646	1
RUFY3	RUFY3	CAD	CAD	23	0	23	25.3402	1
RUFY3	RUFY3	PRKDC	PRKDC	22	0	22	24.2819	1
RUFY3	RUFY3	YTHDC2	YTHDC2	18	0	18	20.0489	1
RUFY3	RUFY3	DOCK7	DOCK7	17	0	17	18.9906	1
RUFY3	RUFY3	MYH9	MYH9	14	0	14	15.8158	1
RUFY3	RUFY3	CKAP5	CKAP5	14	0	14	15.8158	1
RUFY3	RUFY3	IARS	IARS	13	0	13	14.7575	0.99
RUFY3	RUFY3	RUFY1	RUFY1	12	0	12	13.6992	0.99
RUFY3	RUFY3	FLNA	FLNA	11	0	11	12.641	1
RUFY3	RUFY3	DCTN1	DCTN1	9	0	9	10.5244	0.99
RUFY3	RUFY3	IQGAP1	IQGAP1	9	0	9	10.5244	0.99
RUFY3	RUFY3	SNRNP200	SNRNP200	8	0	8	9.46616	1
RUFY3	RUFY3	CUL7	CUL7	8	0	8	9.46616	1
RUFY3	RUFY3	SF3B6	SF3B6	8	0	8	9.46616	0.99
RUFY3	RUFY3	SMC1A	SMC1A	8	0	8	9.46616	0.99
RUFY3	RUFY3	HIST2H3A	HIST2H3A	7	0	7	8.40789	1
RUFY3	RUFY3	SF3B1	SF3B1	7	0	7	8.40789	0.99
RUFY3	RUFY3	HDLBP	HDLBP	7	0	7	8.40789	0.97
RUFY3	RUFY3	TPR	TPR	6	0	6	7.34962	1
RUFY3	RUFY3	CNOT1	CNOT1	6	0	6	7.34962	0.99
RUFY3	RUFY3	JIP4/SPAG9	JIP4/SPAG9	6	0	6	7.34962	0.99
RUFY3	RUFY3	EIF4G1	EIF4G1	6	0	6	7.34962	0.98
RUFY3	RUFY3	RPL23	RPL23	25	3	25	6.86419	0.86
RUFY3	RUFY3	MYH10	MYH10	5	0	5	6.29135	0.99
RUFY3	RUFY3	SMC2	SMC2	5	0	5	6.29135	0.99
RUFY3	RUFY3	UBR5	UBR5	5	0	5	6.29135	0.99
RUFY3	RUFY3	NUP155	NUP155	5	0	5	6.29135	0.99
RUFY3	RUFY3	A2M	A2M	5	0	5	6.29135	0.98
RUFY3	RUFY3	FASN	FASN	5	0	5	6.29135	0.98
RUFY3	RUFY3	RPS14	RPS14	15	2	15	5.62469	0.64
RUFY3	RUFY3	SMC3	SMC3	4	0	4	5.23308	1
RUFY3	RUFY3	USP9X	USP9X	4	0	4	5.23308	1
RUFY3	RUFY3	FLNB	FLNB	4	0	4	5.23308	0.99
RUFY3	RUFY3	DYNC1H1	DYNC1H1	4	0	4	5.23308	0.99
RUFY3	RUFY3	SCRIB	SCRIB	4	0	4	5.23308	0.99
RUFY3	RUFY3	NUP210	NUP210	4	0	4	5.23308	0.99
RUFY3	RUFY3	NME2	NME2	4	0	4	5.23308	0.99
RUFY3	RUFY3	BPIFA1	BPIFA1	4	0	4	5.23308	0.98
RUFY3	RUFY3	SMC4	SMC4	4	0	4	5.23308	0.97
RUFY3	RUFY3	HIST1H4A	HIST1H4A	3	0	3	4.17481	0.99
RUFY3	RUFY3	PLEKHA5	PLEKHA5	3	0	3	4.17481	0.99
RUFY3	RUFY3	RANBP2	RANBP2	3	0	3	4.17481	0.99
RUFY3	RUFY3	IRS4	IRS4	3	0	3	4.17481	0.99
RUFY3	RUFY3	HIST1H1A	HIST1H1A	3	0	3	4.17481	0.99
RUFY3	RUFY3	IKBKAP	IKBKAP	3	0	3	4.17481	0.99
RUFY3	RUFY3	CIT	CIT	3	0	3	4.17481	0.99
RUFY3	RUFY3	SMARCC1	SMARCC1	3	0	3	4.17481	0.98
RUFY3	RUFY3	KIF4A	KIF4A	3	0	3	4.17481	0.98
RUFY3	RUFY3	SMCHD1	SMCHD1	3	0	3	4.17481	0.98
RUFY3	RUFY3	HIST1H1C	HIST1H1C	3	0	3	4.17481	0.98
RUFY3	RUFY3	GSN	GSN	3	0	3	4.17481	0.97
RUFY3	RUFY3	MMTAG2	MMTAG2	3	0	3	4.17481	0.97
RUFY3	RUFY3	BPIFB1	BPIFB1	3	0	3	4.17481	0.96
RUFY3	RUFY3	CAT	CAT	3	0	3	4.17481	0.96
RUFY3	RUFY3	ZG16B	ZG16B	3	0	3	4.17481	0.95
RUFY3	RUFY3	FUT8	FUT8	3	0	3	4.17481	0.95
RUFY3	RUFY3	MSH6	MSH6	3	0	3	4.17481	0.95
RUFY3	RUFY3	NPM1	NPM1	5	1	5	3.14568	0.68
RUFY3	RUFY3	RRP1B	RRP1B	2	0	2	3.11654	0.99
RUFY3	RUFY3	PCDHB16	PCDHB16	2	0	2	3.11654	0.99
RUFY3	RUFY3	TBC1D4	TBC1D4	2	0	2	3.11654	0.99
RUFY3	RUFY3	HIST1H2BH	HIST1H2BH	2	0	2	3.11654	0.98
RUFY3	RUFY3	LTF	LTF	2	0	2	3.11654	0.98
RUFY3	RUFY3	EIF3A	EIF3A	2	0	2	3.11654	0.98
RUFY3	RUFY3	RAD50	RAD50	2	0	2	3.11654	0.98
RUFY3	RUFY3	EPRS	EPRS	2	0	2	3.11654	0.98
RUFY3	RUFY3	ECM1	ECM1	2	0	2	3.11654	0.98
RUFY3	RUFY3	LRP4	LRP4	2	0	2	3.11654	0.98
RUFY3	RUFY3	ARHGAP21	ARHGAP21	2	0	2	3.11654	0.98
RUFY3	RUFY3	ASCC3	ASCC3	2	0	2	3.11654	0.98
RUFY3	RUFY3	ALDH18A1	ALDH18A1	2	0	2	3.11654	0.98
RUFY3	RUFY3	SBSN	SBSN	2	0	2	3.11654	0.97
RUFY3	RUFY3	PRPF8	PRPF8	2	0	2	3.11654	0.97
RUFY3	RUFY3	WRAP73	WRAP73	2	0	2	3.11654	0.97
RUFY3	RUFY3	TBR1	TBR1	2	0	2	3.11654	0.97
RUFY3	RUFY3	SMARCA4	SMARCA4	2	0	2	3.11654	0.97
RUFY3	RUFY3	HAL	HAL	2	0	2	3.11654	0.97
RUFY3	RUFY3	DOCK6	DOCK6	2	0	2	3.11654	0.97
RUFY3	RUFY3	RPL22L1	RPL22L1	2	0	2	3.11654	0.97
RUFY3	RUFY3	NUP205	NUP205	2	0	2	3.11654	0.97
RUFY3	RUFY3	TOP2A	TOP2A	2	0	2	3.11654	0.97
RUFY3	RUFY3	CLASP2	CLASP2	2	0	2	3.11654	0.97
RUFY3	RUFY3	ZNF638	ZNF638	2	0	2	3.11654	0.96
RUFY3	RUFY3	IGHA1	IGHA1	2	0	2	3.11654	0.96
RUFY3	RUFY3	AHNAK	AHNAK	2	0	2	3.11654	0.96
RUFY3	RUFY3	FLII	FLII	2	0	2	3.11654	0.96
RUFY3	RUFY3	RPL31	RPL31	2	0	2	3.11654	0.96
RUFY3	RUFY3	NDUFA12	NDUFA12	2	0	2	3.11654	0.95
RUFY3	RUFY3	CDKN2A	CDKN2A	2	0	2	3.11654	0.95
RUFY3	RUFY3	PFN2	PFN2	2	0	2	3.11654	0.95
RUFY3	RUFY3	RPS26P11	RPS26P11	2	0	2	3.11654	0.95
RUFY3	RUFY3	EMD	EMD	2	0	2	3.11654	0.95
RUFY3	RUFY3	DOCK8	DOCK8	2	0	2	3.11654	0.95
RUFY3	RUFY3	SEC16A	SEC16A	2	0	2	3.11654	0.95
RUFY3	RUFY3	CDA	CDA	2	0	2	3.11654	0.95
RUFY3	RUFY3	ANXA1	ANXA1	2	0	2	3.11654	0.95
RUFY3	RUFY3	CASKIN2	CASKIN2	2	0	2	3.11654	0.95
RUFY3	RUFY3	HMGN2	HMGN2	2	0	2	3.11654	0.94
RUFY3	RUFY3	UBE2NL	UBE2NL	2	0	2	3.11654	0.94
RUFY3	RUFY3	SARNP	SARNP	2	0	2	3.11654	0.94
RUFY3	RUFY3	PFAS	PFAS	2	0	2	3.11654	0.94
RUFY3	RUFY3	TADA2B	TADA2B	2	0	2	3.11654	0.93
RUFY3	RUFY3	NDUFAF3	NDUFAF3	2	0	2	3.11654	0.93
RUFY3	RUFY3	AZGP1	AZGP1	2	0	2	3.11654	0.93
RUFY3	RUFY3	EDF1	EDF1	2	0	2	3.11654	0.93
RUFY3	RUFY3	ISCA2	ISCA2	2	0	2	3.11654	0.93
RUFY3	RUFY3	PLCG1	PLCG1	2	0	2	3.11654	0.92
RUFY3	RUFY3	TRIO	TRIO	2	0	2	3.11654	0.9
RUFY3	RUFY3	FLNC	FLNC	2	0	2	3.11654	0.73
RUFY3	RUFY3	HIST1H2AH	HIST1H2AH	10	3	10	2.89568	0.13
RUFY3	RUFY3	HIST1H2BB	HIST1H2BB	9	3	9	2.63111	0.12
RUFY3	RUFY3	DHX9	DHX9	4	1	4	2.61654	0.75
RUFY3	RUFY3	UBA52	UBA52	4	1	4	2.61654	0.6
RUFY3	RUFY3	PFDN2	PFDN2	5	2	5	2.09712	0.4
RUFY3	RUFY3	SSBP1	SSBP1	3	1	3	2.08741	0.49
RUFY3	RUFY3	PIP	PIP	3	1	3	2.08741	0.46
RUFY3	RUFY3	BLMH	BLMH	3	1	3	2.08741	0.41
RUFY3	RUFY3	RBM39	RBM39	3	1	3	2.08741	0.24
RUFY3	RUFY3	SRSF11	SRSF11	1	0	1	2.05827	0
RUFY3	RUFY3	GAPVD1	GAPVD1	1	0	1	2.05827	0
RUFY3	RUFY3	SEMG1	SEMG1	1	0	1	2.05827	0
RUFY3	RUFY3	SEMG2	SEMG2	1	0	1	2.05827	0
RUFY3	RUFY3	SUMO3	SUMO3	1	0	1	2.05827	0
RUFY3	RUFY3	AFDN	AFDN	1	0	1	2.05827	0
RUFY3	RUFY3	CSDE1	CSDE1	1	0	1	2.05827	0
RUFY3	RUFY3	PAICS	PAICS	1	0	1	2.05827	0
RUFY3	RUFY3	GIGYF2	GIGYF2	1	0	1	2.05827	0
RUFY3	RUFY3	PLP2	PLP2	1	0	1	2.05827	0
RUFY3	RUFY3	TNKS1BP1	TNKS1BP1	1	0	1	2.05827	0
RUFY3	RUFY3	WDR81	WDR81	1	0	1	2.05827	0
RUFY3	RUFY3	HEATR1	HEATR1	1	0	1	2.05827	0
RUFY3	RUFY3	LINC00094	LINC00094	1	0	1	2.05827	0
RUFY3	RUFY3	PNP	PNP	1	0	1	2.05827	0
RUFY3	RUFY3	SERPINA12	SERPINA12	1	0	1	2.05827	0
RUFY3	RUFY3	HUWE1	HUWE1	1	0	1	2.05827	0
RUFY3	RUFY3	PKP2	PKP2	1	0	1	2.05827	0
RUFY3	RUFY3	NDUFA13	NDUFA13	1	0	1	2.05827	0
RUFY3	RUFY3	SAMD9L	SAMD9L	1	0	1	2.05827	0
RUFY3	RUFY3	GFAP	GFAP	1	0	1	2.05827	0
RUFY3	RUFY3	VIM	VIM	1	0	1	2.05827	0
RUFY3	RUFY3	YEATS2	YEATS2	1	0	1	2.05827	0
RUFY3	RUFY3	PHLDB2	PHLDB2	1	0	1	2.05827	0
RUFY3	RUFY3	PCNX3	PCNX3	1	0	1	2.05827	0
RUFY3	RUFY3	CEP170	CEP170	1	0	1	2.05827	0
RUFY3	RUFY3	NUDCD2	NUDCD2	1	0	1	2.05827	0
RUFY3	RUFY3	KRT78	KRT78	1	0	1	2.05827	0
RUFY3	RUFY3	IGLC1	IGLC1	1	0	1	2.05827	0
RUFY3	RUFY3	MAPK8IP3	MAPK8IP3	1	0	1	2.05827	0
RUFY3	RUFY3	SKP1	SKP1	1	0	1	2.05827	0
RUFY3	RUFY3	SUGP2	SUGP2	1	0	1	2.05827	0
RUFY3	RUFY3	GDPD3	GDPD3	1	0	1	2.05827	0
RUFY3	RUFY3	PRSS3	PRSS3	1	0	1	2.05827	0
RUFY3	RUFY3	SMARCA2	SMARCA2	1	0	1	2.05827	0
RUFY3	RUFY3	SCGB1D2	SCGB1D2	1	0	1	2.05827	0
RUFY3	RUFY3	TANC2	TANC2	1	0	1	2.05827	0
RUFY3	RUFY3	EBF3	EBF3	1	0	1	2.05827	0
RUFY3	RUFY3	HMGA1	HMGA1	1	0	1	2.05827	0
RUFY3	RUFY3	MYL6	MYL6	1	0	1	2.05827	0
RUFY3	RUFY3	C12orf56	C12orf56	1	0	1	2.05827	0
RUFY3	RUFY3	NUP214	NUP214	1	0	1	2.05827	0
RUFY3	RUFY3	LUC7L2	LUC7L2	1	0	1	2.05827	0
RUFY3	RUFY3	PSRC1	PSRC1	1	0	1	2.05827	0
RUFY3	RUFY3	ATIC	ATIC	1	0	1	2.05827	0
RUFY3	RUFY3	NKAP	NKAP	1	0	1	2.05827	0
RUFY3	RUFY3	SRSF3	SRSF3	1	0	1	2.05827	0
RUFY3	RUFY3	SFPQ	SFPQ	1	0	1	2.05827	0
RUFY3	RUFY3	LRBA	LRBA	1	0	1	2.05827	0
RUFY3	RUFY3	TMEM230	TMEM230	1	0	1	2.05827	0
RUFY3	RUFY3	ASPRV1	ASPRV1	1	0	1	2.05827	0
RUFY3	RUFY3	RPS15A	RPS15A	1	0	1	2.05827	0
RUFY3	RUFY3	CEP164	CEP164	1	0	1	2.05827	0
RUFY3	RUFY3	PSMA6	PSMA6	1	0	1	2.05827	0
RUFY3	RUFY3	PSMA8	PSMA8	1	0	1	2.05827	0
RUFY3	RUFY3	ACACA	ACACA	1	0	1	2.05827	0
RUFY3	RUFY3	RPS20	RPS20	1	0	1	2.05827	0
RUFY3	RUFY3	FIS1	FIS1	1	0	1	2.05827	0
RUFY3	RUFY3	FAM136A	FAM136A	1	0	1	2.05827	0
RUFY3	RUFY3	GATAD2A	GATAD2A	1	0	1	2.05827	0
RUFY3	RUFY3	MAP4	MAP4	1	0	1	2.05827	0
RUFY3	RUFY3	PIN4	PIN4	1	0	1	2.05827	0
RUFY3	RUFY3	RPL29	RPL29	1	0	1	2.05827	0
RUFY3	RUFY3	NUP188	NUP188	1	0	1	2.05827	0
RUFY3	RUFY3	NET1	NET1	1	0	1	2.05827	0
RUFY3	RUFY3	MCM5	MCM5	1	0	1	2.05827	0
RUFY3	RUFY3	S100A14	S100A14	1	0	1	2.05827	0
RUFY3	RUFY3	S100A16	S100A16	1	0	1	2.05827	0
RUFY3	RUFY3	CXorf56	CXorf56	1	0	1	2.05827	0
RUFY3	RUFY3	EIF1AX	EIF1AX	1	0	1	2.05827	0
RUFY3	RUFY3	CCIN	CCIN	1	0	1	2.05827	0
RUFY3	RUFY3	STMN1	STMN1	1	0	1	2.05827	0
RUFY3	RUFY3	CPA4	CPA4	1	0	1	2.05827	0
RUFY3	RUFY3	PIK3R4	PIK3R4	1	0	1	2.05827	0
RUFY3	RUFY3	FLYWCH2	FLYWCH2	1	0	1	2.05827	0
RUFY3	RUFY3	MRPL14	MRPL14	1	0	1	2.05827	0
RUFY3	RUFY3	RHOG	RHOG	1	0	1	2.05827	0
RUFY3	RUFY3	GRPEL1	GRPEL1	1	0	1	2.05827	0
RUFY3	RUFY3	VPS35	VPS35	1	0	1	2.05827	0
RUFY3	RUFY3	PIMREG	PIMREG	1	0	1	2.05827	0
RUFY3	RUFY3	PSMB3	PSMB3	1	0	1	2.05827	0
RUFY3	RUFY3	CEP152	CEP152	1	0	1	2.05827	0
RUFY3	RUFY3	AMOT	AMOT	1	0	1	2.05827	0
RUFY3	RUFY3	CLPX	CLPX	1	0	1	2.05827	0
RUFY3	RUFY3	RMI2	RMI2	1	0	1	2.05827	0
RUFY3	RUFY3	RPS19BP1	RPS19BP1	1	0	1	2.05827	0
RUFY3	RUFY3	GLIPR2	GLIPR2	1	0	1	2.05827	0
RUFY3	RUFY3	TARBP1	TARBP1	1	0	1	2.05827	0
RUFY3	RUFY3	RPS18	RPS18	4	2	4	1.74436	0.23
RUFY3	RUFY3	RPS25	RPS25	5	3	5	1.57284	0.11
RUFY3	RUFY3	RPL27	RPL27	2	1	2	1.55827	0.39
RUFY3	RUFY3	EIF6	EIF6	2	1	2	1.55827	0.34
RUFY3	RUFY3	ANXA2	ANXA2	4	3	4	1.30827	0.07
RUFY3	RUFY3	TUBB2B	TUBB2B	2	2	2	1.03885	0.03
RUFY3	RUFY3	CDSN	CDSN	2	2	2	1.03885	0.02
RUFY3	RUFY3	GGCT	GGCT	1	1	1	1.02914	0
RUFY3	RUFY3	DMBT1	DMBT1	1	1	1	1.02914	0
RUFY3	RUFY3	RPLP1	RPLP1	1	1	1	1.02914	0
RUFY3	RUFY3	FABP5	FABP5	1	1	1	1.02914	0
RUFY3	RUFY3	PRSS2	PRSS2	1	1	1	1.02914	0
RUFY3	RUFY3	RPL22	RPL22	1	1	1	1.02914	0
RUFY3	RUFY3	LYZ	LYZ	1	1	1	1.02914	0
RUFY3	RUFY3	UBXN1	UBXN1	1	1	1	1.02914	0
RUFY3	RUFY3	JPT2	JPT2	1	1	1	1.02914	0
RUFY3	RUFY3	PKM	PKM	7	8	7	0.934211	0
RUFY3	RUFY3	CLTC	CLTC	10	12	10	0.890977	0
RUFY3	RUFY3	PRDX2	PRDX2	2	3	2	0.779135	0
RUFY3	RUFY3	SF3B3	SF3B3	2	3	2	0.779135	0
RUFY3	RUFY3	RPS16	RPS16	3	5	3	0.695802	0
RUFY3	RUFY3	PRDX4	PRDX4	1	2	1	0.68609	0
RUFY3	RUFY3	SLC25A6	SLC25A6	1	2	1	0.68609	0
RUFY3	RUFY3	SLC25A5	SLC25A5	1	2	1	0.68609	0
RUFY3	RUFY3	SNRPD3	SNRPD3	1	2	1	0.68609	0
RUFY3	RUFY3	GLRX2	GLRX2	1	2	1	0.68609	0
RUFY3	RUFY3	KHSRP	KHSRP	2	4	2	0.623308	0
RUFY3	RUFY3	TXN	TXN	2	4	2	0.623308	0
RUFY3	RUFY3	DDX17	DDX17	2	5	2	0.519424	0
RUFY3	RUFY3	TPI1	TPI1	1	3	1	0.514568	0
RUFY3	RUFY3	RPS19	RPS19	1	3	1	0.514568	0
RUFY3	RUFY3	RPL12	RPL12	1	4	1	0.411654	0
RUFY3	RUFY3	LDHA	LDHA	1	6	1	0.294039	0
RUFY3	RUFY3	TUBA1C	TUBA1C	2	11	2	0.259712	0
RUFY3	RUFY3	CBR1	CBR1	11	49	11	0.25282	0
RUFY3	RUFY3	ENO1	ENO1	2	12	2	0.239734	0
RUFY3	RUFY3	HSPA1B	HSPA1B	2	12	2	0.239734	0
RUFY3	RUFY3	EEF1B2	EEF1B2	2	14	2	0.207769	0
RUFY3	RUFY3	ACTA2	ACTA2	1	9	1	0.205827	0
RUFY3	RUFY3	HSPA5	HSPA5	3	22	3	0.181514	0
RUFY3	RUFY3	PRDX1	PRDX1	1	11	1	0.171523	0
RUFY3	RUFY3	HSPA1L	HSPA1L	2	21	2	0.141661	0
RUFY3	RUFY3	HSPA9	HSPA9	1	14	1	0.137218	0
RUFY3	RUFY3	EEF2	EEF2	1	14	1	0.137218	0
RUFY3	RUFY3	TUBB4B	TUBB4B	3	30	3	0.134671	0
RUFY3	RUFY3	GAPDH	GAPDH	1	19	1	0.102914	0
RUFY3	RUFY3	HSPA8	HSPA8	1	22	1	0.0894901	0
RUFY3	RUFY3	EEF1A1	EEF1A1	4	79	4	0.0654135	0
