# Supplementary material for: RUFY3 links Arl8b and JIP4-Dynein complex to regulate lysosome size and positioning
Source: Research Square preprint supplement (doi:10.21203/rs.3.rs-345822/v1), 2021-04-15
Supplement: Supplementary file 2 [file f3499a0c67a11c7af39d311a.docx]

| **Supplementary Table III:** List of antibodies used in this study.  (WB: Western Blot; IF: Immunofluorescence) | | |
| --- | --- | --- |
| **Antibody** | **Source** | **Identifier** |
| Rabbit anti-RUFY3/RIPX (WB-1:1500) | Novus Biologicals | NBP1-89614 |
| Rabbit anti-JIP4/SPAG9 (WB-1:1000; IF-1:100) | Cell Signaling Technology | 5519S |
| Rabbit anti-Rab5 (WB-1:1000) | Cell Signaling Technology | 2143S |
| Rabbit anti-Calreticulin (WB-1:1000) | Cell Signaling Technology | 12238S |
| Rabbit anti-Catalase (WB-1:1000) | Cell Signaling Technology | 12980S |
| Rabbit anti-EEA1 (IF-1:100) | Cell Signaling Technology | 3288S |
| Rabbit anti-FLAG tag (IF-1:500) | Cell Signaling Technology | 2368S |
| Rabbit anti-LC3B (WB-1:1000) | Cell Signaling Technology | 3868S |
| Rabbit anti-LAMP1 (WB-1:5000; IF-1:1000) | Abcam | ab24170 |
| Rabbit anti-Cathepsin D (WB-1:1500; IF-1:200) | Abcam | ab75852 |
| Rabbit anti-TfR (IF-1:500) | Abcam | ab84036 |
| Rabbit anti-VDAC (WB-1:1000) | Thermo Fisher Scientific | PA1-954A |
| Rabbit anti-FLAG tag (WB-1:4000) | Thermo Fisher Scientific | PA1-984B |
| Rabbit anti-LC3 (IF-1:1000) | MBL International Corporation | PM036 |
| Rabbit anti-p62/SQSTM1 (IF-1:1000) | MBL International Corporation | PM045 |
| Rabbit anti-EGFR (WB-1:1000) | Santa Cruz Biotechnology | sc-03 |
| Rabbit anti-HA tag (WB-1:4000; IF-1:500) | Sigma-Aldrich | H6908 |
| Rabbit anti-Arl8 (WB-1:1000) | Custom-made | Previously described (Garg S et al., Immunity 2011) |
| Mouse anti-LAMP1 (IF-1:500) | BD Bioscience | 555798 |
| Mouse anti-p150 (WB-1:1500; IF-1:100) | BD Bioscience | 610474 |
| Mouse anti-CD63 (IF-1:200) | BD Bioscience | 556019 |
| Mouse anti-DIC (WB-1:5000) | BioLegend | 904901 |
| Mouse anti-HA tag (WB-1:4000; IF-1:500) | BioLegend | 901503 |
| Mouse anti-Tom-20 (IF-1:500) | Santa Cruz Biotechnology | sc-17764 |
| Mouse anti-GAPDH (WB-1:2000) | Santa Cruz Biotechnology | sc-166574 |
| Mouse anti-β-tubulin (WB-1:4000) | Sigma-Aldrich | T4026 |
| Mouse anti-FLAG tag (WB-1:4000; IF-1:500) | Sigma-Aldrich | F1804 |
| Mouse anti-His tag (WB-1:5000) | Sigma-Aldrich | SAB1305538 |
| Mouse anti-Ub (IF-1:1000) | MBL International Corporation | D058-3 |
| Alexa-Fluor 488-conjugated goat anti-rabbit IgG (IF-1:500) | Thermo Fisher Scientific | A11034 |
| Alexa-Fluor 568-conjugated goat anti-rabbit IgG (IF-1:500) | Thermo Fisher Scientific | A11036 |
| Alexa-Fluor 488-conjugated goat anti-mouse IgG (IF-1:500) | Thermo Fisher Scientific | 11029 |
| Alexa-Fluor 568-conjugated goat anti-mouse IgG (IF-1:500) | Thermo Fisher Scientific | 11031 |
| HRP-conjugated goat anti-rabbit IgG (WB-1:5000) | Jackson ImmunoResearch | 111-035-144 |
| HRP-conjugated goat anti-mouse IgG (WB-1:5000) | Jackson ImmunoResearch | 115-035-166 |
